# Supplementary material
Source: Elsevier journal article supplement (https://oceanrep.geomar.de/id/eprint/21546/2/mmc1.docx)
Supplement: mmc1 [file mmc1.docx]

Fig. S1: Settlement tile set-up. A non-corrosive 1 cm diameter, 15 cm long bolt was driven through the middle of the tile pair and hammered into dead coral material. The head of the bolt was equipped with a screw thread and a nut in order to allow tile exchange.

**
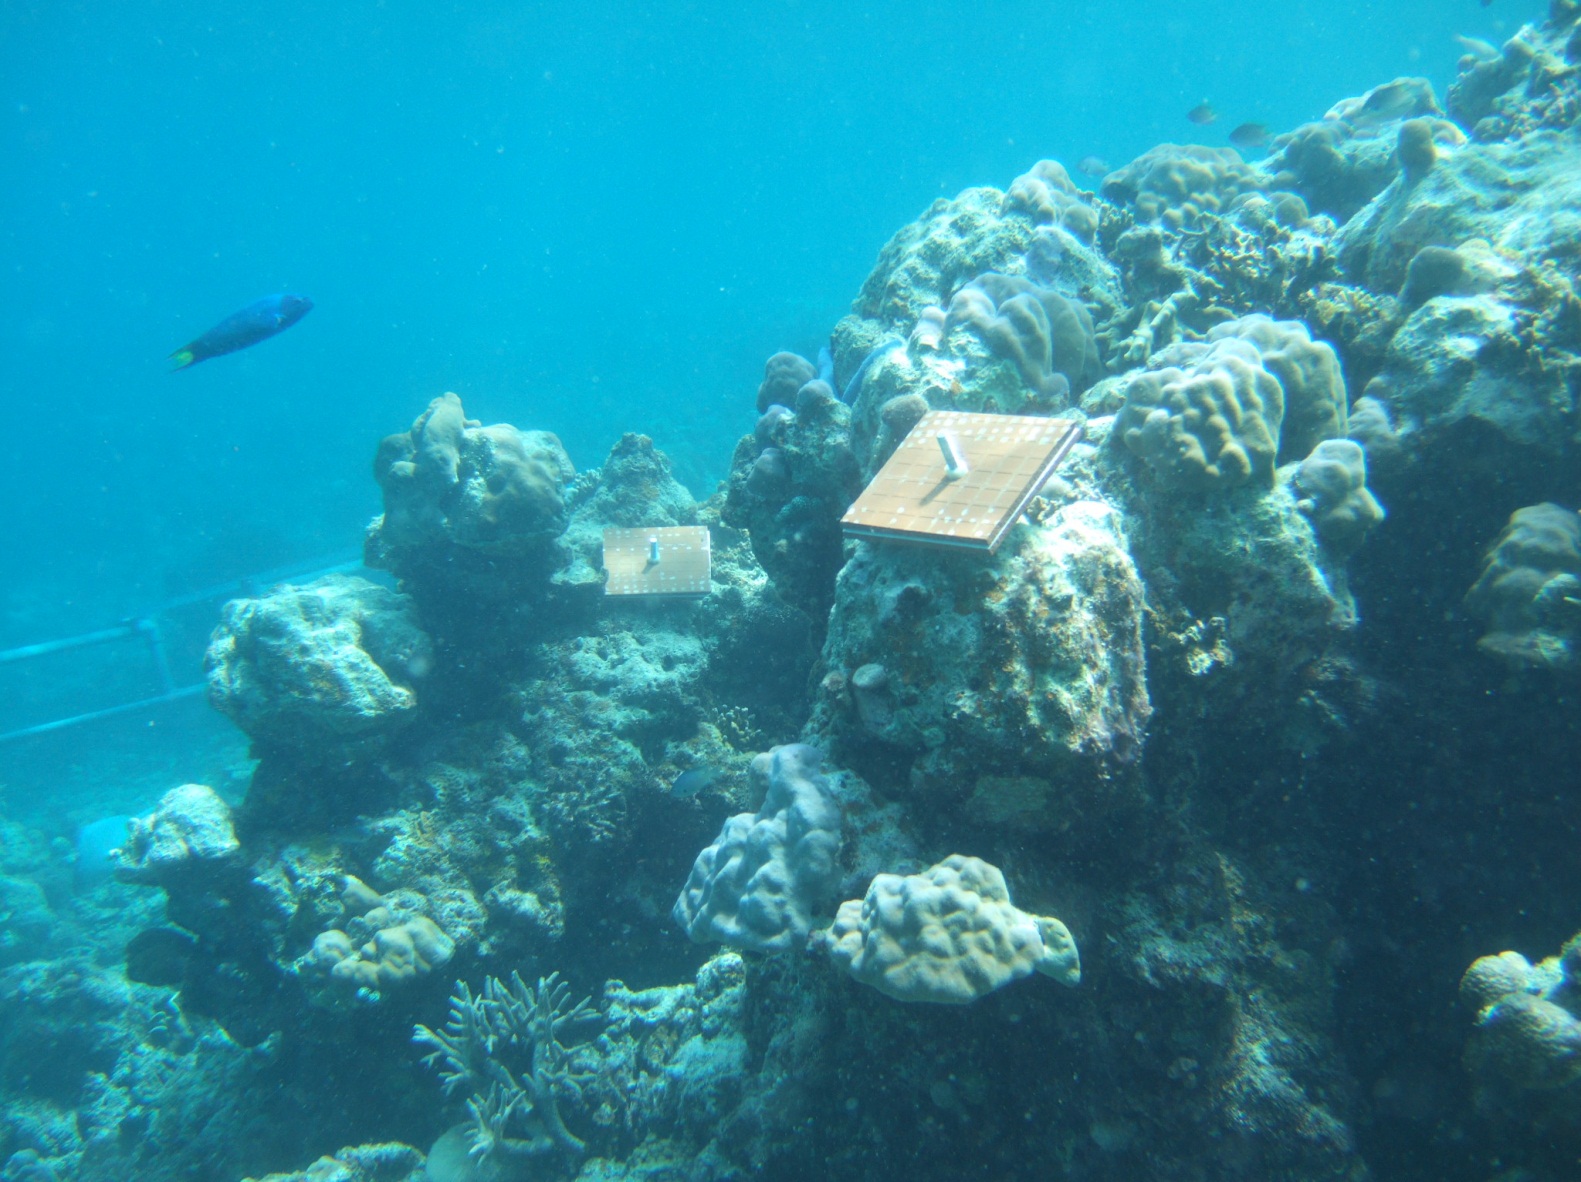
**
